# Supplementary material for: Peptidome analysis of human milk from women delivering macrosomic fetuses reveals multiple means of protection for infants
Source: PubMed Central journal article supplement (PMC5325381; doi:10.18632/oncotarget.11532), 2016-08-23
Supplement: oncotarget-07-63514-s001.pdf [file oncotarget-07-63514-s001.pdf]

## Peptidome analysis of human milk from women delivering macrosomic fetuses reveals multiple means of protection for infants

### Supplementary Materials

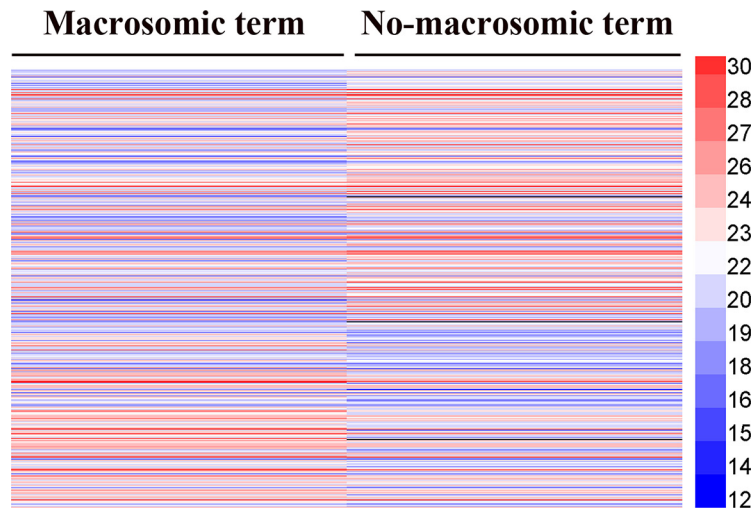

**Supplementary Figure S1:** Hierarchical clustering shows a remarkable peptide expression profile change between macrosomic group and non- macrosomic group.

**Supplementary Table S1:** All peptides identified from Mass Spectrometry (MS) analysis.  
(See Supplementary\_Table\_S1)
